# Supplementary material for: Bioinspired tilt-angle fabricated structure gradient fibers: micro-drops fast transport in a long-distance
Source: PubMed Central journal article supplement — Sci Rep. 2013 Oct 11;3:2927. doi: 10.1038/srep02927 (PMC3795351; doi:10.1038/srep02927), 2013-10-11
Supplement: srep02927-s2.pdf [file srep02927-s2.pdf]

# Supplementary Information:

## **Bioinspired tilt-angle fabricated structure gradient fibers: micro-drops fast transport in a long-distance**

Yuan Chen, Lin Wang, Yan Xue, Lei Jiang & Yongmei Zheng\*

Key Laboratory of Bio-Inspired Smart Interfacial Science and Technology of Ministry of Education, School of Chemistry and Environment, Beihang University, Beijing, 100191 (P. R. China).

Corresponding author: e-mail: [zhengym@buaa.edu.cn](mailto:zhengym@buaa.edu.cn)

### Content:

Figure Legends (Figs. S1-S5)

Tables (Tab. S1-3)

Movie (Movie S1).

## Supplementary Figure Legends: (Figs. S1-S5)

Figure S1:

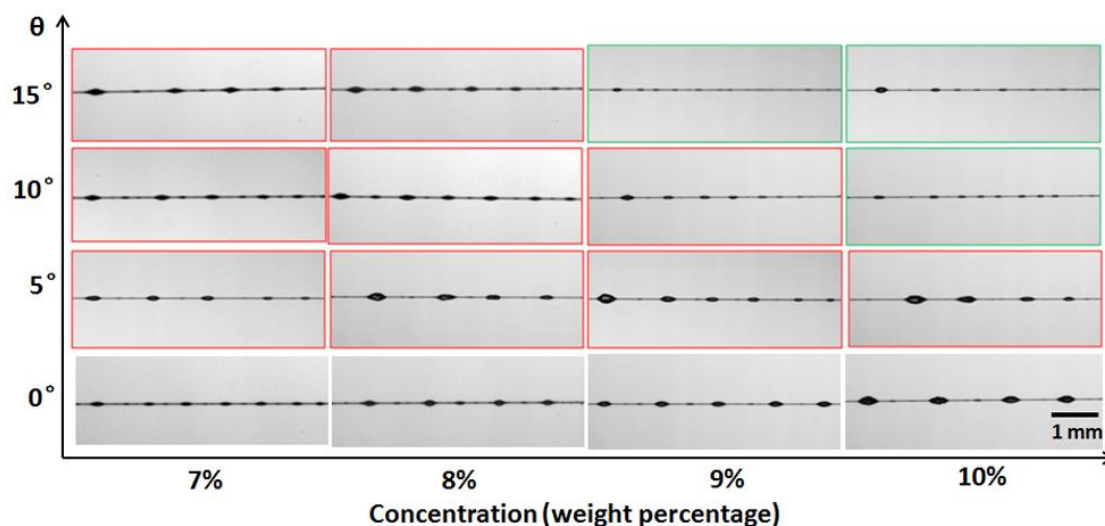

**Figure S1 | Optical images of BFGS fabricated at different conditions by drawing the nylon fibers out of the PVDF/DMF solution.** The concentration of the polymer solution is 7%, 8%, 9%, or 10% (weight percentage) and the angle to the horizontal line is 0°, 5°, 10°, or 15° with the same drawing-out velocity  $\sim 200$  mm/min. In the green frame images, there are no obvious gradient structures on the spindle-knots. In the images with red frame, the obvious gradient spindle-knots appear. At 0° angle to the horizontal line condition, there are uniform spindle-knots. Under 5° and 8% or 9% condition, the bioinspired gradient fibers are the most suitable for water transport because of the height gradient and pitch of two spindle-knots. At high tilt angle, e.g., 15°, the largest pitch of two spindle-knots is more than 2 mm, which is not conducive to water transport. In our experiment, we choose the pitch close to 1.5 mm to observe the water transport.

Figure S2:

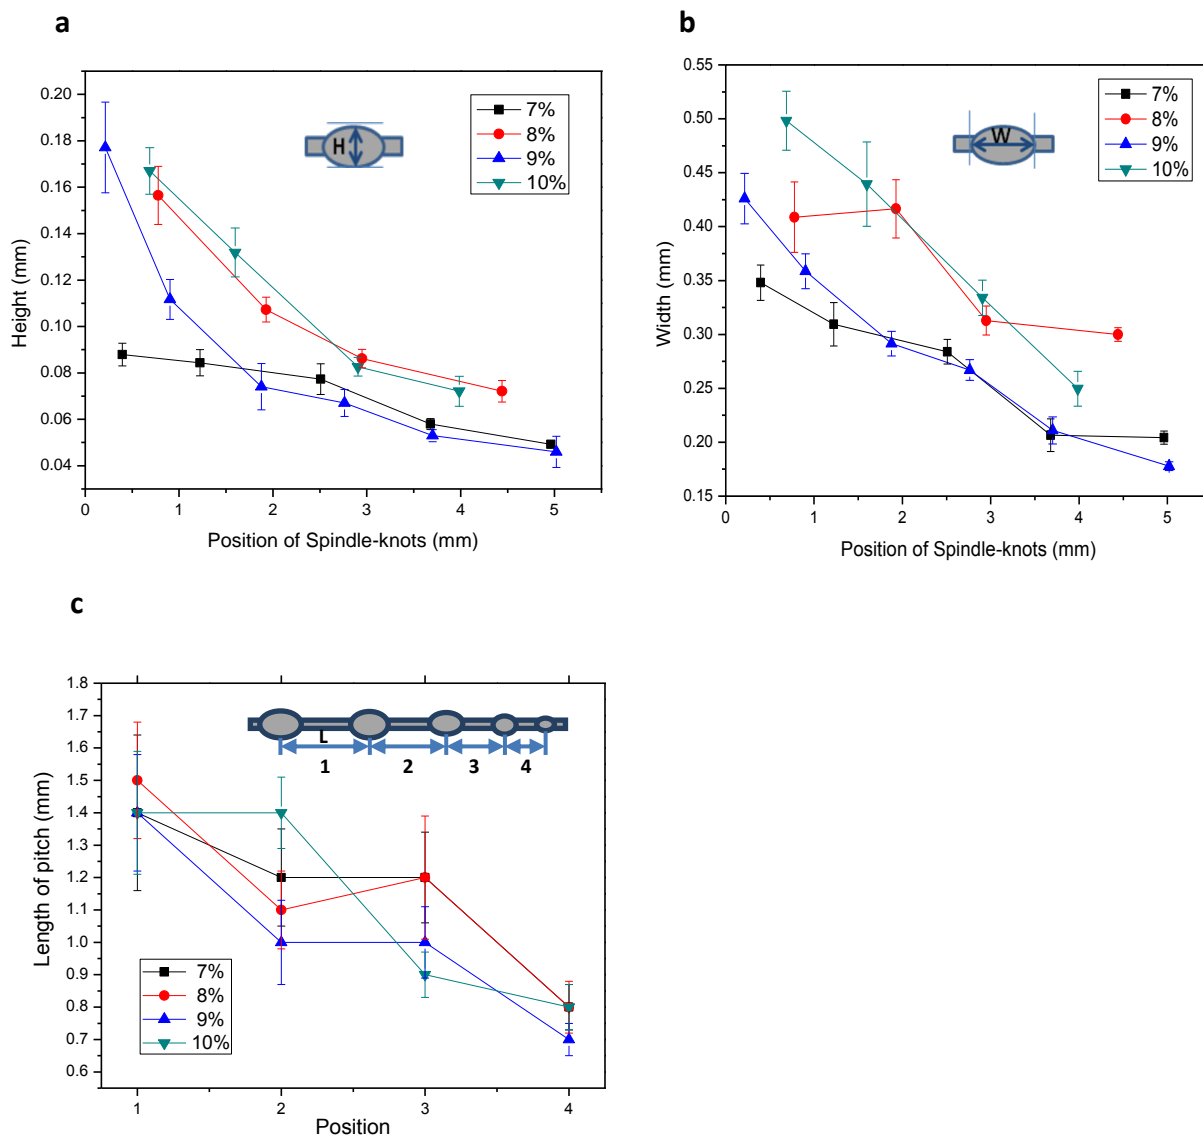

**Figure S2 | The statistical data of the height (a), width (b) of the gradient spindle-knots respectively and four pitches of two spindle-knots (c) along the gradient fibers. At high concentration (10%), the slope rate is bigger than low concentration (7%) with height and width. At low concentration (7%), the height is from 0.09~0.05 mm, the width gradient from 0.35~0.21 mm, while the height and width range from 0.17~0.07 mm and 0.50~0.24 mm at high concentration (10%), respectively. However, the distance of two spindle-knots has no obvious difference with the concentration for the relative position. In our experiment, the most pitch is close to ~ 1.5 mm, which is suit for the water transport.**

Figure S3:

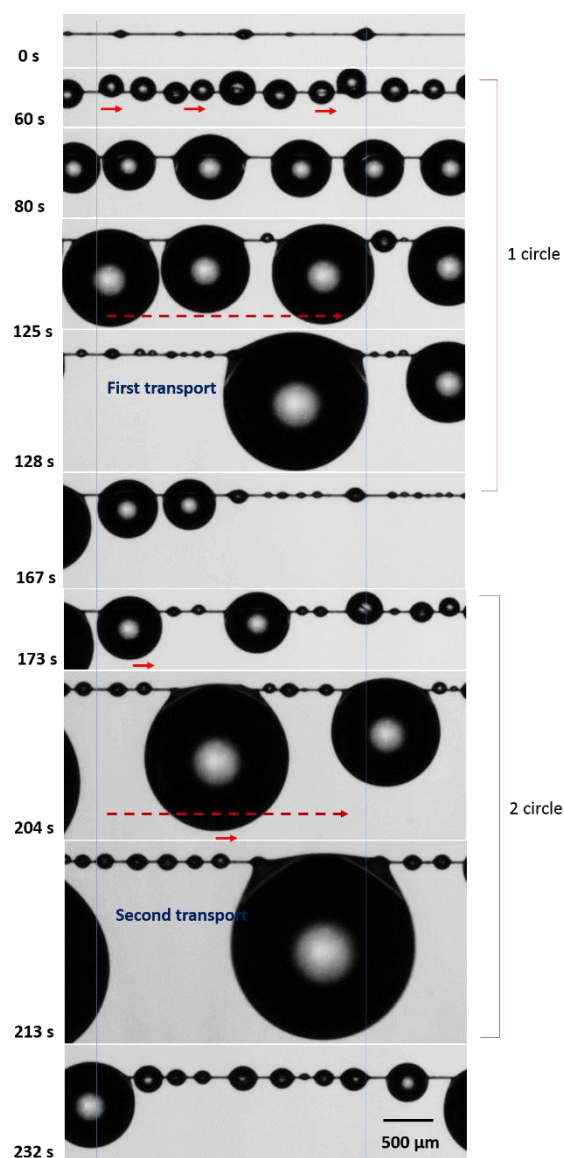

**Figure S3 | Images of repeatability of droplet transport process.** From 0 s to ~ 128 s, the water drops complete the first transport process. Then the biggest drop falls down from the bioinspired fiber. At ~ 167 s, the small drops continuously grow on the spindle-knots and start the second transport. At ~ 213 s, the second transport process finishes. Then the third transport process begins at ~ 232 s. These images show the repeatability of drop transport process. The bioinspired fiber can continuously transport the water drops.

Figure S4:

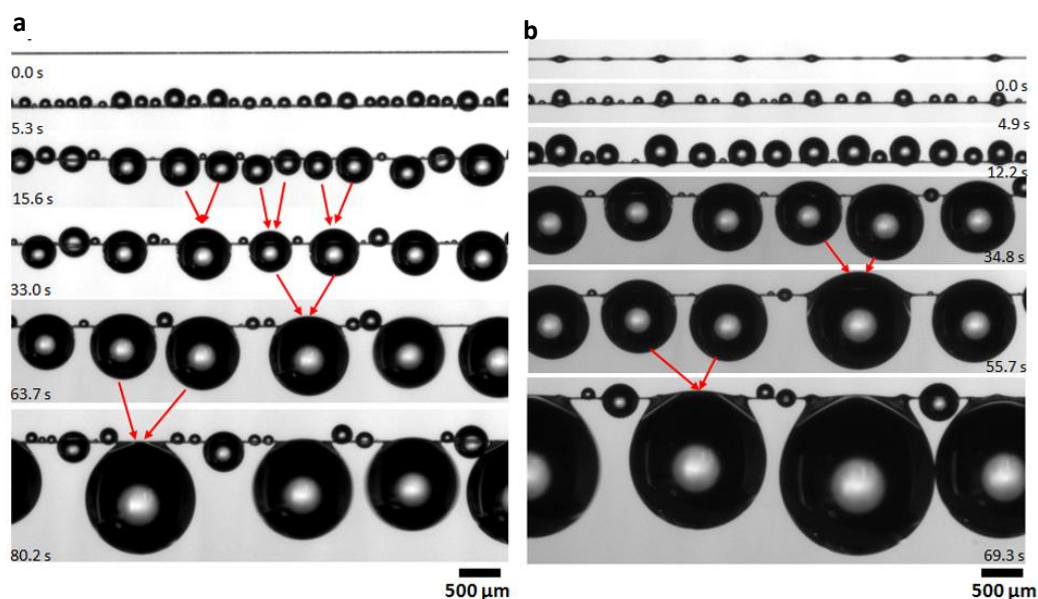

**Figure S4 | Optical images show water drops coalescence on the uniform nylon fiber and uniform spindle-knots fiber.** The uniform nylon fiber is coated with PVDF. Two fibers are horizontally placed under a humidity of more than 90% via fog flow at rate of  $\sim 30$  cm/s. There are no obvious movements of water drops for a long distance. The water drops are coalesced with surrounding drops and stay on the original position (on the uniform nylon fiber (a) or stably hang on two spindle-knots on the uniform spindle-knots fiber (b)).

Figure S5:

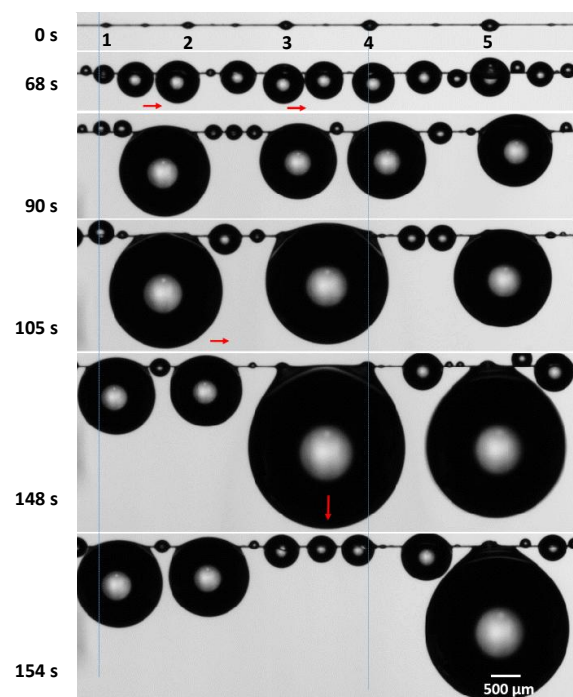

**Figure S5 | Water transport affected by too big pitch.** A gradient fiber is fabricated by tilt angle dip-coating with  $15^\circ$  and 8% concentration solution. A gradient spindle-knot fiber with five spindle-knots (marked with number 1→ number 5, height:  $\sim 57 \mu\text{m}$ ,  $\sim 76 \mu\text{m}$ ,  $\sim 148 \mu\text{m}$ ,  $\sim 246 \mu\text{m}$ ,  $\sim 286 \mu\text{m}$ ; width:  $\sim 89 \mu\text{m}$ ,  $\sim 106 \mu\text{m}$ ,  $\sim 256 \mu\text{m}$ ,  $\sim 296 \mu\text{m}$ ,  $\sim 348 \mu\text{m}$  respectively) is selected. The pitches of two adjacent spindle-knots (from 1 to 5) are  $\sim 1.4 \text{ mm}$ ,  $\sim 1.5 \text{ mm}$ ,  $\sim 1.4 \text{ mm}$  and  $\sim 1.8 \text{ mm}$ , respectively. The largest pitch is too big to water transport. The movement distance of water drops is limited by the last pitch (between 4 and 5).

## Supplementary Tables

**Table S1. Viscosity ( $\eta$ ) and surface tension ( $\gamma$ ) of PVDF solutions with different concentration**

| Concentration<br>(weight %) | Viscosity ( $\eta$ )<br>(mPa·s) | Surface tension ( $\gamma$ )<br>(mN/m) |
|-----------------------------|---------------------------------|----------------------------------------|
| 7%                          | 144                             | 36.379±0.124                           |
| 8%                          | 216                             | 36.612±0.115                           |
| 9%                          | 316                             | 36.729±0.242                           |
| 10%                         | 460                             | 36.823±0.213                           |

**Table S2. The length of largest pitch of two spindle-knots**

| Length (mm) | 7%  | 8%  | 9%  | 10% |
|-------------|-----|-----|-----|-----|
| 15°         | 2.0 | 1.4 | --- | --- |
| 10°         | 1.5 | 1.5 | 0.9 | --- |
| 5°          | 1.4 | 1.5 | 1.4 | 1.2 |

**Table S3. Result of fitting relationship between Height (H) of spindle-knot and Velocity (V) of drop coalescence via analyst of Origin software.**

| Equation    | $V=A_1 \cdot \exp (-H/t_1)+V_0$ |          |                |
|-------------|---------------------------------|----------|----------------|
| Adj. R-Squr | 0.96318                         |          |                |
|             |                                 | Value    | Standard Error |
|             | $V_0$                           | 0.15707  | 0.02249        |
|             | $A_1$                           | -0.14478 | 0.02002        |
|             | $t_1$                           | 204.6485 | 52.8495        |

### Supplementary Movie (Movie S1).

In-situ observation of the water collection and drop transport are focused on the BFGS with three gradient spindle-knots observed under humidity of ~ 95% via fog flow at velocity of ~ 30 cm s<sup>-1</sup> at room temperature, which was recorded by CCD camera. The dynamic process can be seen in Supplementary Movie S1.

Movie S1: Water collected quickly by the transport of coalesced drops.
